# Supplementary material for: Effect of Dietary Curcumin Supplementation on Duck Growth Performance, Antioxidant Capacity and Breast Meat Quality
Source: MDPI journal article supplement (doi:10.3390/foods10122981), 2021-12-03
Supplement: s1 [file s1]

**Table S1.** Ingredient composition and nutrient content of the basal diet (% , as-fed basis).

| Items                            | 1-4 Weeks         | 5-8 Weeks         | 9-10 Weeks        |
|----------------------------------|-------------------|-------------------|-------------------|
| Ingredient                       |                   |                   |                   |
| Corn (7.9)                       | 61.70             | 68.94             | 75.80             |
| Soybean meal (45)                | 26.09             | 26.80             | 20.10             |
| Corn protein flour (55)          | 7.90              | —                 | —                 |
| Dicalcium phosphate              | 1.40              | 1.40              | 1.40              |
| Limestone                        | 1.08              | 1.06              | 1.06              |
| Salt                             | 0.38              | 0.38              | 0.38              |
| DL-Methionine                    | 0.15              | 0.22              | 0.16              |
| L-Lysine                         | 0.20              | 0.10              | 0.00              |
| choline chloride (50%)           | 0.10              | 0.10              | 0.10              |
| Premix                           | 1.00 <sup>1</sup> | 1.00 <sup>2</sup> | 1.00 <sup>3</sup> |
| Total                            | 100               | 100               | 100               |
| Nutritional level                |                   |                   |                   |
| Calculated nutrient <sup>4</sup> |                   |                   |                   |
| Metabolizable energy (MJ/kg)     | 12.14             | 11.98             | 12.21             |
| CP (%)                           | 20.67             | 17.51             | 15.03             |
| Calcium (%)                      | 0.90              | 0.90              | 0.88              |
| Total phosphorus (%)             | 0.68              | 0.67              | 0.65              |
| Non-phytate phosphorus (%)       | 0.44              | 0.44              | 0.44              |
| Lysine (%)                       | 1.07              | 0.95              | 0.71              |
| Methionine (%)                   | 0.48              | 0.48              | 0.39              |
| Methionine +cystine (%)          | 0.81              | 0.75              | 0.63              |
| Threonine (%)                    | 0.75              | 0.66              | 0.56              |
| Tryptophane (%)                  | 0.21              | 0.19              | 0.16              |

<sup>1</sup> The premix provided per kilogram diet: vitamin A 4000 IU, vitamin D3 2000 IU, vitamin E 20 mg, vitamin K3 2.0 mg, vitamin B1 2.0 mg, vitamin B2 12 mg, vitamin B6 3.0 mg, vitamin B12 0.02 mg, nicotinic acid 50 mg, D-pantothenic acid 10 mg, folic acid 1 mg, biotin 0.2 mg, Cu 8 mg, Fe 60 mg, Mn 100 mg, Zn 60 mg, Se 0.2 mg, I 0.4 mg.

<sup>2</sup> The premix provided per kilogram diet: vitamin A 3000 IU, vitamin D3 2000 IU, vitamin E 10 mg, vitamin K3 2.0 mg, vitamin B1 1.5 mg, vitamin B2 8 mg, nicotinic acid 30 mg, D-pantothenic acid 10 mg, vitamin B6 3.0 mg, vitamin B12 0.02 mg, biotin 0.1 mg, folic acid 1 mg, Cu 8 mg, Fe 60 mg, Mn 80 mg, Zn 40 mg, Se 0.2 mg, I 0.4 mg.

<sup>3</sup> The premix provided per kilogram diet: vitamin A 2500 IU, vitamin D3 1000 IU, vitamin E 10 mg, vitamin K3 2.0 mg, vitamin B1 1.5 mg, vitamin B2 8 mg, nicotinic acid 30 mg, D-pantothenic acid 10 mg, vitamin B6 3.0 mg, vitamin B12 0.02 mg, biotin 0.1 mg, folic acid 1 mg, Cu 8 mg, Fe 60 mg, Mn 80 mg, Zn 40 mg, Se 0.2 mg, I 0.3 mg.

<sup>4</sup> Values were calculated based on the data provided by Feed Database in China (2004).

**Table S2.** Concentration (ng g<sup>-1</sup>) of volatile compounds identified and quantified by gas chromatography/mass spectrometry in the duck breast muscle with different dietary curcumin.

| Volatile Compounds (ng g <sup>-1</sup> ) | Groups             |                    |                    |                   | SEM   | <i>p</i> -Value | <i>p</i> -Value |           | CAS        |
|------------------------------------------|--------------------|--------------------|--------------------|-------------------|-------|-----------------|-----------------|-----------|------------|
|                                          | T <sub>0</sub>     | T <sub>300</sub>   | T <sub>400</sub>   | T <sub>500</sub>  |       |                 | Linear          | Quadratic |            |
| Aldehydes                                |                    |                    |                    |                   |       |                 |                 |           |            |
| Nonanal                                  | 22.15 <sup>a</sup> | 6.93 <sup>b</sup>  | 6.83 <sup>b</sup>  | 6.51 <sup>b</sup> | 0.194 | < 0.001         | 0.027           | < 0.001   | 124-19-6   |
| Hexanal                                  | 20.49 <sup>a</sup> | 15.49 <sup>b</sup> | 10.65 <sup>c</sup> | 3.16 <sup>d</sup> | 0.275 | < 0.001         | 0.000           | < 0.001   | 66-25-1    |
| Benzaldehyde                             | 2.93 <sup>a</sup>  | 0.00 <sup>b</sup>  | 0.00 <sup>b</sup>  | 0.00 <sup>b</sup> | 0.045 | < 0.001         | 0.033           | < 0.001   | 100-52-7   |
| Hexadecanal                              | 2.82 <sup>a</sup>  | 0.00 <sup>b</sup>  | 0.00 <sup>b</sup>  | 0.00 <sup>b</sup> | 0.043 | < 0.001         | 0.033           | < 0.001   | 629-80-1   |
| Tetradecanal                             | 4.21 <sup>a</sup>  | 0.00 <sup>b</sup>  | 0.00 <sup>b</sup>  | 0.00 <sup>b</sup> | 0.037 | < 0.001         | 0.033           | < 0.001   | 124-25-4   |
| Pentadecanal                             | 4.70 <sup>a</sup>  | 0.00 <sup>b</sup>  | 0.00 <sup>b</sup>  | 0.00 <sup>b</sup> | 0.010 | < 0.001         | 0.033           | < 0.001   | 2765-11-9  |
| 2-Octenal, (E)-                          | 6.66 <sup>a</sup>  | 0.00 <sup>b</sup>  | 0.00 <sup>b</sup>  | 0.00 <sup>b</sup> | 0.061 | < 0.001         | 0.033           | < 0.001   | 2548-87-0  |
| 2-Decenal, (E)-                          | 3.33 <sup>a</sup>  | 0.00 <sup>b</sup>  | 0.00 <sup>b</sup>  | 0.00 <sup>b</sup> | 0.201 | < 0.001         | 0.035           | < 0.001   | 3913-81-3  |
| 2,4-Nonadienal, (E,E)-                   | 2.90 <sup>a</sup>  | 0.00 <sup>b</sup>  | 0.00 <sup>b</sup>  | 0.00 <sup>b</sup> | 0.041 | < 0.001         | 0.033           | < 0.001   | 5910-87-2  |
| 2,4-Decadienal, (E,E)-                   | 28.62 <sup>a</sup> | 0.00 <sup>b</sup>  | 0.00 <sup>b</sup>  | 0.00 <sup>b</sup> | 0.618 | < 0.001         | 0.033           | < 0.001   | 25152-84-5 |
| 2-Nonenal, (E)-                          | 5.10 <sup>a</sup>  | 0.00 <sup>b</sup>  | 0.00 <sup>b</sup>  | 0.00 <sup>b</sup> | 0.082 | < 0.001         | 0.033           | < 0.001   | 18829-56-6 |
| Benzaldehyde, 3-hydroxy-4-methoxy-       | 3.40 <sup>a</sup>  | 0.00 <sup>b</sup>  | 0.00 <sup>b</sup>  | 0.00 <sup>b</sup> | 0.082 | < 0.001         | 0.033           | < 0.001   | 621-59-0   |

|                                      |                    |                    |                    |                    |       |         |         |         |            |
|--------------------------------------|--------------------|--------------------|--------------------|--------------------|-------|---------|---------|---------|------------|
| Ketones                              |                    |                    |                    |                    |       |         |         |         |            |
| 2,3-Octanedione                      | 60.07 <sup>a</sup> | 24.49 <sup>b</sup> | 20.33 <sup>c</sup> | 17.02 <sup>d</sup> | 1.297 | < 0.001 | 0.008   | < 0.001 | 585-25-1   |
| Acetoin                              | 3.82 <sup>a</sup>  | 3.56 <sup>b</sup>  | 3.50 <sup>b</sup>  | 2.83 <sup>c</sup>  | 0.057 | < 0.001 | < 0.001 | < 0.001 | 513-86-0   |
| Alcohols                             |                    |                    |                    |                    |       |         |         |         |            |
| 1-Pentanol                           | 3.61 <sup>d</sup>  | 4.91 <sup>c</sup>  | 4.15 <sup>b</sup>  | 7.80 <sup>a</sup>  | 0.100 | < 0.001 | 0.006   | 0.002   | 71-41-0    |
| 1-Hexanol                            | 3.30 <sup>a</sup>  | 3.17 <sup>b</sup>  | 3.71 <sup>c</sup>  | 7.32 <sup>d</sup>  | 0.111 | < 0.001 | < 0.001 | < 0.001 | 111-27-3   |
| 1-Octen-3-ol                         | 42.20 <sup>d</sup> | 43.93 <sup>c</sup> | 44.93 <sup>b</sup> | 46.03 <sup>a</sup> | 0.142 | < 0.001 | < 0.001 | < 0.001 | 1832-68-4  |
| 1-Octanol                            | 5.75 <sup>a</sup>  | 2.44 <sup>b</sup>  | 2.37 <sup>c</sup>  | 2.67 <sup>c</sup>  | 0.076 | < 0.001 | < 0.001 | < 0.001 | 111-87-5   |
| Cyclooctyl alcohol                   | 0.00 <sup>b</sup>  | 0.00 <sup>b</sup>  | 0.00 <sup>b</sup>  | 2.82 <sup>a</sup>  | 0.043 | < 0.001 | 0.033   | < 0.001 | 696-71-9   |
| 3-Octanol, 2-methyl-                 | 2.71 <sup>d</sup>  | 3.55 <sup>c</sup>  | 8.46 <sup>b</sup>  | 12.54 <sup>a</sup> | 0.217 | < 0.001 | < 0.001 | < 0.001 | 26533-34-6 |
| 1-Hexanol, 2-ethyl-                  | 4.74 <sup>a</sup>  | 2.72 <sup>b</sup>  | 2.61 <sup>b</sup>  | 2.24 <sup>c</sup>  | 0.089 | < 0.001 | < 0.001 | < 0.001 | 104-76-7   |
| Cyclohexanol, 4-(1,1-dimethylethyl)- | 5.60 <sup>c</sup>  | 5.72 <sup>c</sup>  | 11.91 <sup>a</sup> | 11.32 <sup>b</sup> | 0.241 | 0.002   | 0.002   | 0.003   | 98-52-2    |
| 2-Decen-1-ol, (E)-                   | 2.49 <sup>d</sup>  | 5.52 <sup>c</sup>  | 5.80 <sup>b</sup>  | 7.81 <sup>a</sup>  | 0.081 | < 0.001 | < 0.001 | < 0.001 | 18409-18-2 |
| trans-2-Undecen-1-ol                 | 2.87 <sup>c</sup>  | 2.94 <sup>b</sup>  | 3.82 <sup>b</sup>  | 5.52 <sup>a</sup>  | 0.084 | < 0.001 | < 0.001 | < 0.001 | 75039-84-8 |
| 2,3-Butanediol                       | 3.23 <sup>d</sup>  | 3.47 <sup>c</sup>  | 6.01 <sup>b</sup>  | 7.00 <sup>a</sup>  | 0.069 | < 0.001 | < 0.001 | < 0.001 | 513-85-9   |
| Acids                                |                    |                    |                    |                    |       |         |         |         |            |
| Butanoic acid                        | 4.61 <sup>a</sup>  | 2.33 <sup>b</sup>  | 1.92 <sup>c</sup>  | 1.61 <sup>d</sup>  | 0.087 | < 0.001 | 0.004   | < 0.001 | 107-92-6   |

|                                                         |                    |                    |                    |                    |       |         |         |         |            |
|---------------------------------------------------------|--------------------|--------------------|--------------------|--------------------|-------|---------|---------|---------|------------|
| Hexanoic acid                                           | 6.95 <sup>a</sup>  | 6.01 <sup>b</sup>  | 5.72 <sup>c</sup>  | 5.69 <sup>c</sup>  | 0.096 | 0.002   | 0.007   | < 0.001 | 142-62-1   |
| Octanoic acid                                           | 3.2                | 3.24               | 3.13               | 3.23               | 0.083 | < 0.001 | 0.857   | 0.746   | 124-07-2   |
| Nonanoic acid                                           | 3.23 <sup>a</sup>  | 2.48 <sup>b</sup>  | 2.40 <sup>c</sup>  | 2.18 <sup>d</sup>  | 0.026 | < 0.001 | 0.001   | 0.000   | 112-05-0   |
| n-Decanoic acid                                         | 5.14 <sup>b</sup>  | 5.55 <sup>a</sup>  | 4.56 <sup>c</sup>  | 4.58 <sup>c</sup>  | 0.019 | < 0.001 | 0.016   | 0.055   | 334-48-5   |
| Benzoic acid                                            | 6.71 <sup>a</sup>  | 4.12 <sup>b</sup>  | 3.59 <sup>c</sup>  | 2.53 <sup>d</sup>  | 0.055 | < 0.001 | < 0.001 | 0.000   | 65-85-0    |
| Dodecanoic acid                                         | 3.89               | 3.83               | 3.78               | 3.77               | 0.062 | 0.276   | 0.044   | 0.146   | 143-07-7   |
| n-Hexadecanoic acid                                     | 21.37 <sup>a</sup> | 17.89 <sup>b</sup> | 15.17 <sup>c</sup> | 14.02 <sup>d</sup> | 0.081 | < 0.001 | < 0.001 | < 0.001 | 57-11-4    |
| Tetradecanoic acid                                      | 2.17 <sup>a</sup>  | 0.00 <sup>b</sup>  | 0.00 <sup>b</sup>  | 0.00 <sup>b</sup>  | 0.009 | < 0.001 | < 0.001 | < 0.001 | 544-63-8   |
| Acetic acid                                             | 6.58 <sup>a</sup>  | 6.57 <sup>a</sup>  | 6.27 <sup>b</sup>  | 5.20 <sup>c</sup>  | 0.088 | < 0.001 | < 0.001 | < 0.001 | 64-19-7    |
| Esters                                                  |                    |                    |                    |                    |       |         |         |         |            |
| Hexanoic acid, methyl ester                             | 10.89 <sup>a</sup> | 7.48 <sup>b</sup>  | 7.52 <sup>b</sup>  | 7.13 <sup>b</sup>  | 0.339 | < 0.001 | < 0.001 | < 0.001 | 6624-60-8  |
| Nonanoic acid, methyl ester                             | 0.00 <sup>c</sup>  | 3.22 <sup>b</sup>  | 4.72 <sup>a</sup>  | 4.80 <sup>a</sup>  | 0.084 | < 0.001 | < 0.001 | < 0.001 | 1731-84-6  |
| Octanoic acid, methyl ester                             | 6.33 <sup>c</sup>  | 7.80 <sup>b</sup>  | 7.99 <sup>ab</sup> | 8.09 <sup>a</sup>  | 0.092 | < 0.001 | 0.010   | < 0.001 | 10152-76-8 |
| iso-Amyl levulinate                                     | 8.41 <sup>d</sup>  | 9.02 <sup>c</sup>  | 10.62 <sup>b</sup> | 17.71 <sup>a</sup> | 0.124 | < 0.001 | 0.005   | < 0.001 | 71172-75-3 |
| 9-Octadecenoic acid, methyl ester, (E)-                 | 3.63 <sup>b</sup>  | 5.30 <sup>a</sup>  | 5.14 <sup>a</sup>  | 5.18 <sup>a</sup>  | 0.095 | < 0.001 | 0.003   | 0.009   | 22147-34-8 |
| 1,2-Benzenedicarboxylic acid, bis(2-methylpropyl) ester | 3.01 <sup>c</sup>  | 3.29 <sup>b</sup>  | 3.38 <sup>b</sup>  | 4.91 <sup>a</sup>  | 0.077 | < 0.001 | 0.005   | 0.000   | 84-69-5    |
| 9-Hexadecenoic acid, methyl ester, (Z)-                 | 2.71 <sup>c</sup>  | 3.19 <sup>a</sup>  | 2.80 <sup>b</sup>  | 3.21 <sup>a</sup>  | 0.038 | < 0.001 | 0.026   | 0.089   | 1120-25-8  |

|                                                |                    |                    |                    |                    |       |         |         |         |            |
|------------------------------------------------|--------------------|--------------------|--------------------|--------------------|-------|---------|---------|---------|------------|
| 9,12-Octadecadienoic acid (Z,Z)-, methyl ester | 3.52 <sup>d</sup>  | 5.44 <sup>b</sup>  | 4.69 <sup>c</sup>  | 5.64 <sup>a</sup>  | 0.059 | < 0.001 | < 0.001 | 0.001   | 112-63-0   |
| Hexadecanoic acid, methyl ester                | 4.52 <sup>b</sup>  | 4.55 <sup>b</sup>  | 4.56 <sup>b</sup>  | 5.10 <sup>a</sup>  | 0.045 | < 0.001 | 0.023   | < 0.001 | 112-39-0   |
| Alkenes                                        |                    |                    |                    |                    |       |         |         | < 0.001 |            |
| 2-Octen-1-ol, (E)-                             | 6.03 <sup>d</sup>  | 10.39 <sup>c</sup> | 11.42 <sup>b</sup> | 14.13 <sup>a</sup> | 0.13  | < 0.001 | < 0.001 | < 0.001 | 18409-17-1 |
| Anethole                                       | 0.00 <sup>c</sup>  | 0.00 <sup>c</sup>  | 2.38 <sup>b</sup>  | 5.83 <sup>a</sup>  | 0.036 | < 0.001 | 0.002   | < 0.001 | 4180-23-8  |
| Hexadecane                                     | 0.00 <sup>d</sup>  | 6.44 <sup>c</sup>  | 8.20 <sup>b</sup>  | 9.41 <sup>a</sup>  | 0.043 | < 0.001 | < 0.001 | < 0.001 | 629-73-2   |
| Alkanes                                        |                    |                    |                    |                    |       |         |         | < 0.001 |            |
| Tetradecane                                    | 2.76 <sup>d</sup>  | 3.67 <sup>c</sup>  | 3.80 <sup>b</sup>  | 4.53 <sup>a</sup>  | 0.054 | < 0.001 | < 0.001 | < 0.001 | 629-59-4   |
| Octadecane                                     | 2.06 <sup>d</sup>  | 3.53 <sup>c</sup>  | 4.11 <sup>b</sup>  | 10.96 <sup>a</sup> | 0.052 | < 0.001 | 0.003   | < 0.001 | 593-45-3   |
| Cantharidin                                    |                    |                    |                    |                    |       |         |         | < 0.001 |            |
| Cantharidin                                    | 0.00 <sup>b</sup>  | 0.00 <sup>b</sup>  | 0.00 <sup>b</sup>  | 3.80 <sup>a</sup>  | 0.041 | < 0.001 | 0.033   | < 0.001 | 56-25-7    |
| Silicide                                       |                    |                    |                    |                    |       |         |         | < 0.001 |            |
| Cycloheptasiloxane, tetradecamethyl-           | 43.14 <sup>a</sup> | 11.47 <sup>b</sup> | 10.79 <sup>c</sup> | 6.01 <sup>d</sup>  | 0.257 | < 0.001 | < 0.001 | < 0.001 | 107-50-6   |
| Cyclooctasiloxane, hexadecamethyl-             | 8.11 <sup>d</sup>  | 6.39 <sup>c</sup>  | 5.73 <sup>b</sup>  | 5.34 <sup>a</sup>  | 0.096 | < 0.001 | < 0.001 | < 0.001 | 556-68-3   |
| Cyclononasiloxane, octadecamethyl-             | 25.30 <sup>a</sup> | 16.52 <sup>b</sup> | 13.77 <sup>c</sup> | 0.00 <sup>d</sup>  | 0.367 | < 0.001 | < 0.001 | < 0.001 | 556-71-8   |
| Alanine                                        |                    |                    |                    |                    |       |         |         | < 0.001 |            |
| Alanine                                        | 0.00 <sup>b</sup>  | 0.00 <sup>b</sup>  | 0.00 <sup>b</sup>  | 7.32 <sup>a</sup>  | 0.123 | < 0.001 | 0.033   | < 0.001 | 56-41-7    |

|                       |                   |                   |                   |                   |       |         |         |         |            |
|-----------------------|-------------------|-------------------|-------------------|-------------------|-------|---------|---------|---------|------------|
| Furan                 |                   |                   |                   |                   |       |         |         | < 0.001 |            |
| Furan, 2-pentyl-      | 2.44 <sup>d</sup> | 3.60 <sup>c</sup> | 3.90 <sup>b</sup> | 4.27 <sup>a</sup> | 0.089 | < 0.001 | < 0.001 | < 0.001 | 3777-69-3  |
| Sulfide               |                   |                   |                   |                   |       |         |         | < 0.001 |            |
| Sulfide, allyl methyl | 9.90              | 9.94              | 9.95              | 9.95              | 0.317 | 0.404   | 0.078   | 0.212   | 10152-76-8 |

SEM = Standard error of the means. Orthogonal polynomials were used to investigate linear and quadratic responses to the level of curcumin treatment.  
Results were means with n = 10 per group.
